# Supplementary material for: Molecular Basis of Rhodomyrtone Resistance in Staphylococcus aureus
Source: PubMed Central journal article supplement (PMC8844917; doi:10.1128/mbio.03833-21), 2022-02-15
Supplement: mbio.03833-21-sf001.pdf [file mbio.03833-21-sf001.pdf]

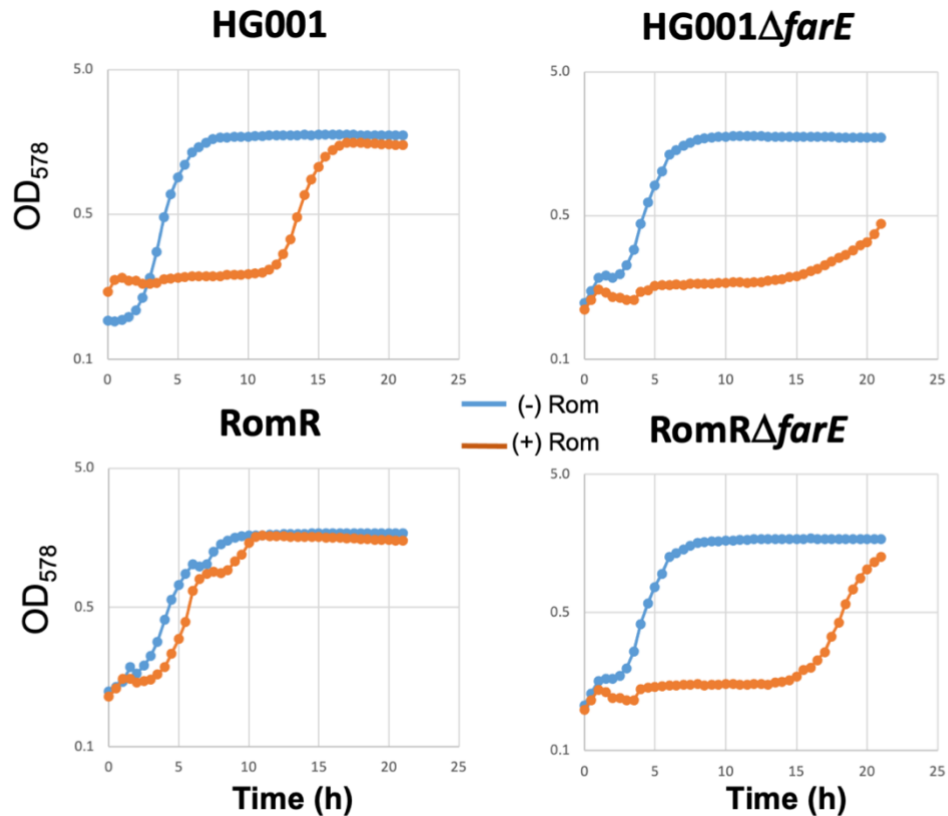

**Figure S1. Impact of Rom on the growth of HG001 and RomR and their respective  $\Delta farE$  mutants.** The growth of the *S. aureus* clones in BM supplemented with Rom (8  $\mu\text{g/ml}$ ) was followed for 24 h. Growth of HG001 was inhibited for about 12 h but resumed thereafter; growth of HG001 $\Delta farE$  was inhibited for the whole period. Growth of RomR mutant was unaffected in the presence of Rom (completely resistant to Rom), while the growth of RomR $\Delta farE$  was inhibited for about 15 h, and resumed thereafter. The result indicate that FarE is crucial for Rom resistance. The graph shown here is a representative of one of the triplicates growth studies performed.
