# Supplementary material for: Molecular Basis of Rhodomyrtone Resistance in Staphylococcus aureus
Source: PubMed Central journal article supplement (PMC8844917; doi:10.1128/mbio.03833-21), 2022-02-15
Supplement: mbio.03833-21-sf002.pdf [file mbio.03833-21-sf002.pdf]

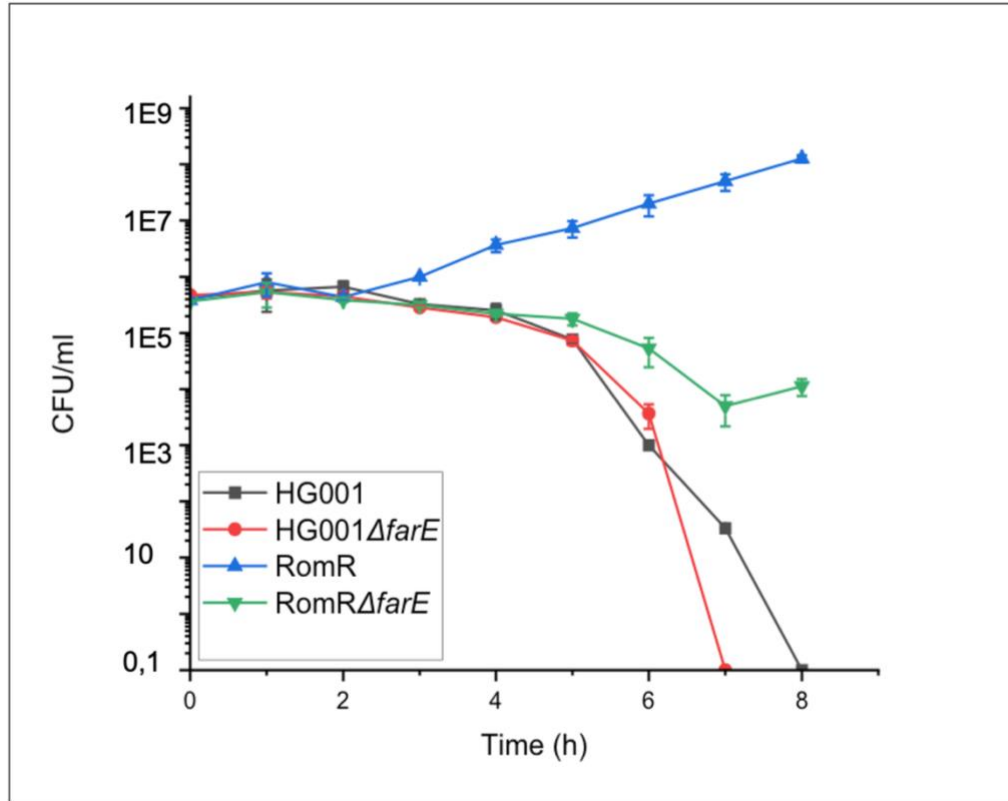

**Figure S2. Impact of Rom on the killing of HG001 and RomR and their respective  $\Delta$ farE mutants.** The killing of the *S. aureus* clones in BM supplemented with Rom (8  $\mu$ g/ml) was followed for 8 h. Cells were inoculated to a cell concentration of about  $6 \times 10^5$  cfu/ml. HG001 and HG001 $\Delta$ farE were almost completely killed after 7-8 h, while growth of the RomR mutant continued. With RomR $\Delta$ farE mutant, killing was also observed, but it was markedly delayed compared to HG001 and HG001 $\Delta$ farE. Each bar represents the mean  $\pm$  SD from three independent biological replicates.
