# Supplementary material for: Molecular Basis of Rhodomyrtone Resistance in Staphylococcus aureus
Source: PubMed Central journal article supplement (PMC8844917; doi:10.1128/mbio.03833-21), 2022-02-15
Supplement: mbio.03833-21-sf003.pdf [file mbio.03833-21-sf003.pdf]

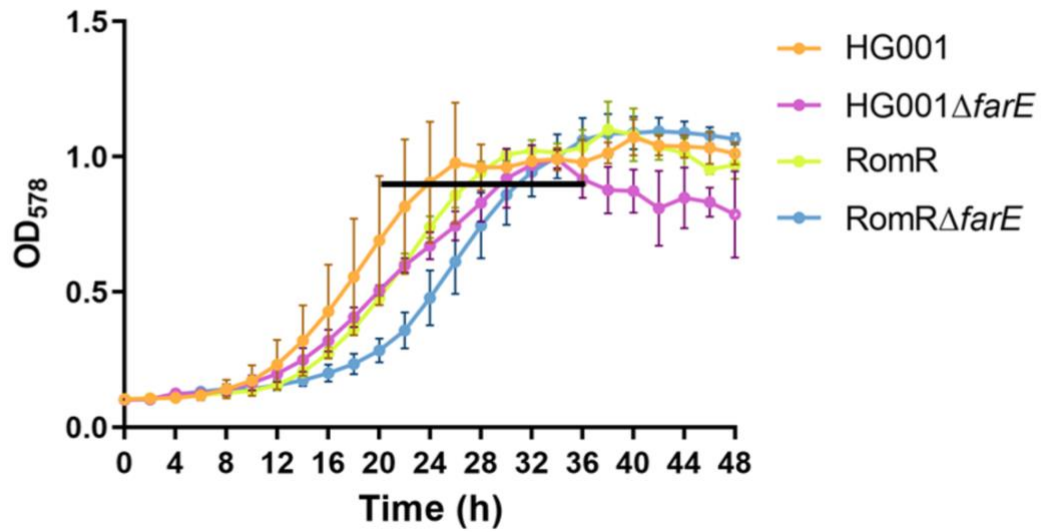

**Figure S3. Comparative growth of HG001 and its mutants in defined minimal medium (AAM) using a microplate reader.** Each point in the graph is the mean  $\pm$  SD of three independent biological replicates; bar, indicates end-exponential phase ( $OD_{578} \approx 0.9$ ) at which the cells were harvested for lipidomic analysis.
