# Supplementary material for: Molecular Basis of Rhodomyrtone Resistance in Staphylococcus aureus
Source: PubMed Central journal article supplement (PMC8844917; doi:10.1128/mbio.03833-21), 2022-02-15
Supplement: mbio.03833-21-sf004.pdf [file mbio.03833-21-sf004.pdf]

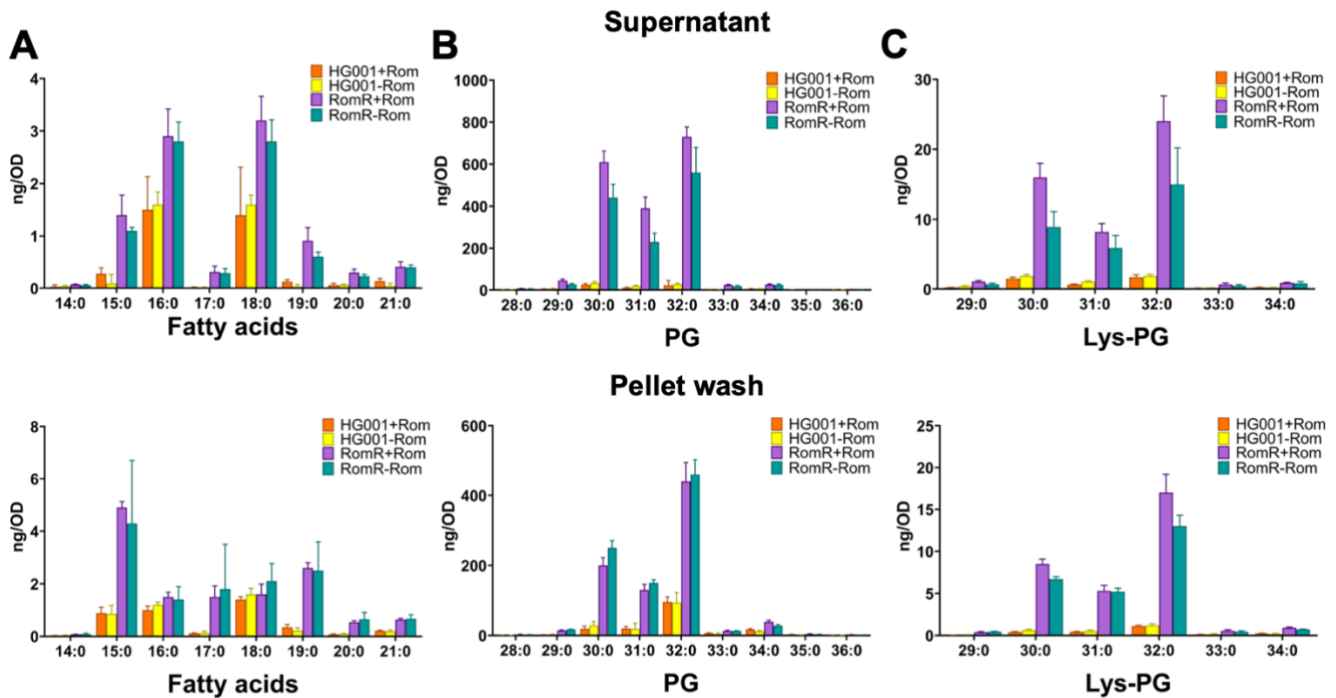

**Figure S4. Effect of sub-inhibitory concentrations of Rom on the release of fatty acids and lipids by the *S. aureus* HG001 and RomR strains in the supernatant (above) and pellet wash (below).** The bar charts show the amount of (A) fatty acids ranging from C14:0 to C21:0 (B) phosphatidylglycerol (PG) ranging from C28:0 to C36:0 and (C) lysyl phosphatidylglycerol (Lys-PG) ranging from C29:0 to C:34 detected in both the strains in the presence of sub-inhibitory concentration of Rom at 0.3  $\mu\text{g/ml}$ . All absolute amounts of FAs and lipids were reported in ng/OD<sub>578</sub> of the bacterial cultures grown until end exponential phase and adjusted to the corresponding OD<sub>578</sub> = 1.0. The supernatant and pellet were separated by centrifugation for lipidomic analyses. The pellet wash was obtained by treating the pellets with 90% isopropanol to remove the fatty acids and lipids from the surface of cells. Each bar shown in the chart represents the mean  $\pm$  SD from five independent biological replicates.
