# Supplementary material for: Molecular Basis of Rhodomyrtone Resistance in Staphylococcus aureus
Source: PubMed Central journal article supplement (PMC8844917; doi:10.1128/mbio.03833-21), 2022-02-15
Supplement: mbio.03833-21-sf005.pdf [file mbio.03833-21-sf005.pdf]

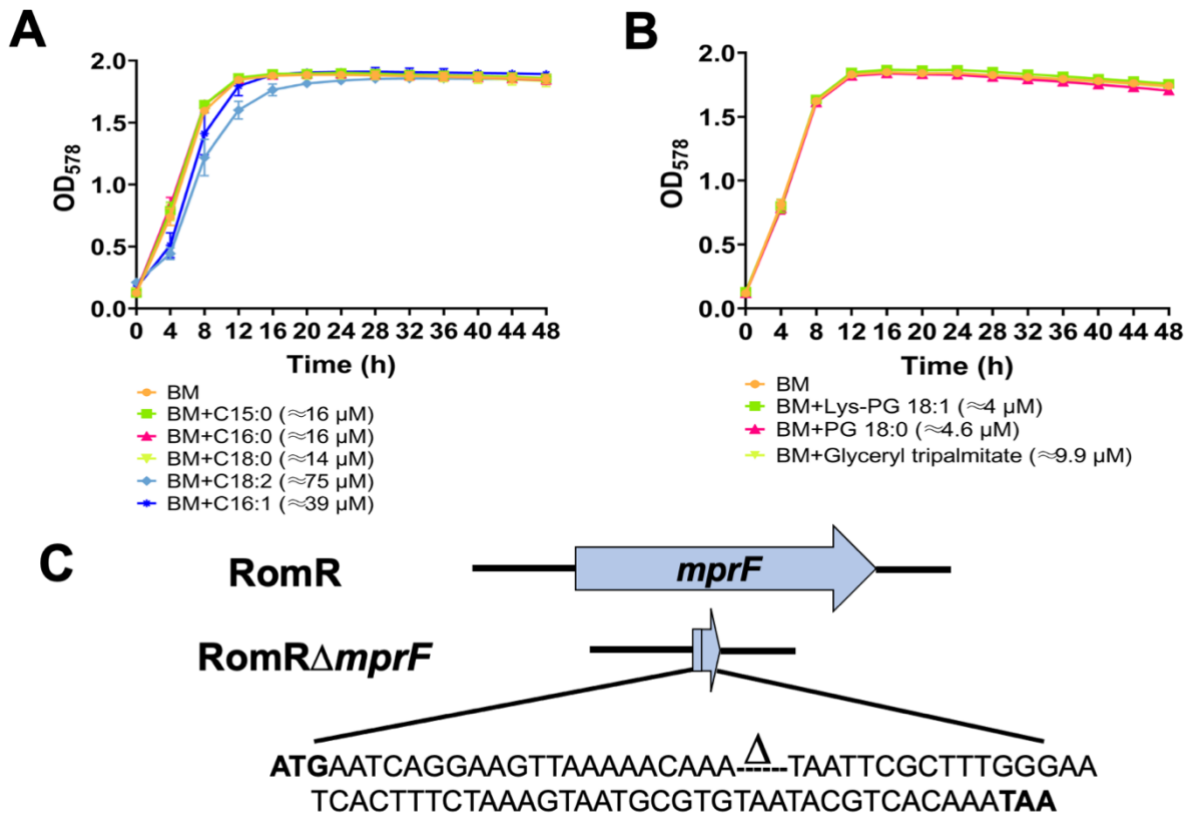

**Figure S5. Impact of exogenous supplementation of FAs / lipids on the growth of HG001 and construction of RomRΔmprF.** The growth of *S. aureus* HG001 in BM with supplementations of **(A)** fatty acids at 4 μg/ml C15:0 (≈16 μM), 4 μg/ml C18:0 (≈14 μM), 4 μg/ml C16:0 (≈16 μM), 10 μg/ml C16:1 (≈39 μM) 21 μg/ml C18:2 (≈75 μM); **(B)** lipids at 4 μg/ml PG 18:0 (≈4.6 μM), 4 μg/ml Lys-PG 18:1 (≈4 μM). Well containing BM only and bacteria was regarded as positive control. Growth of the bacteria was measured at OD<sub>578</sub> every 4 h for 48 h using a microplate reader Varioskan Lux (Thermo Scientific) in a 48 wells plate. Each point in the graph is the mean ± SD from three independent biological replicates. **(C)** Illustration of RomRΔmprF deletion mutant.
