# Supplementary material for: Molecular Basis of Rhodomyrtone Resistance in Staphylococcus aureus
Source: PubMed Central journal article supplement (PMC8844917; doi:10.1128/mbio.03833-21), 2022-02-15
Supplement: mbio.03833-21-sf006.pdf [file mbio.03833-21-sf006.pdf]

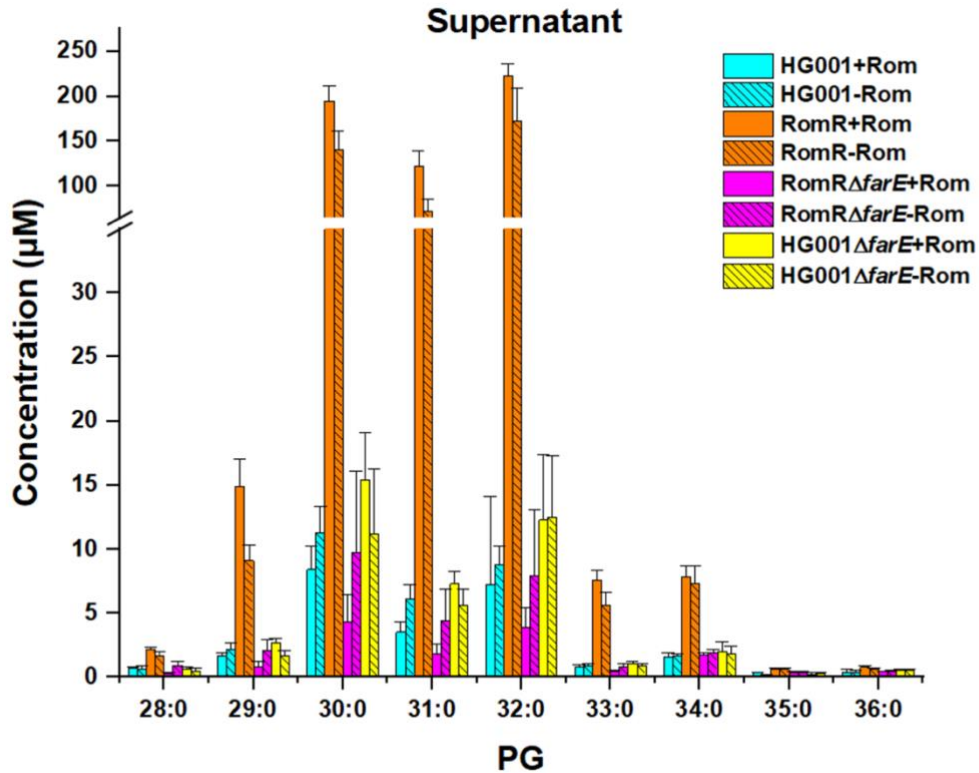

**Figure S6. Lipidomic analysis in supernatants only for PGs in HG001, RomR, HG001 $\Delta$ farE and RomR $\Delta$ farE in the absence and presence of Rom.** This illustration is similar to the one in Fig. 2. The only difference is that here, we show the molarity (and not ng/OD) of PGs in the supernatant. The PGs ranged from C28:0 to C36:0. It is observed that the presence of sublethal concentration of Rom did not alter much the PG release.
